# Supplementary material for: Ets Family Transcription Factor Fli-1 Promotes Leukocyte Recruitment and Production of IL-17A in the MRL/Lpr Mouse Model of Lupus Nephritis
Source: PubMed Central journal article supplement (PMC7140643; doi:10.3390/cells9030714), 2020-03-14
Supplement: cells-09-00714-s001.pdf [file cells-09-00714-s001.pdf]

Supplementary figure 1

### Anti-ds DNA levels

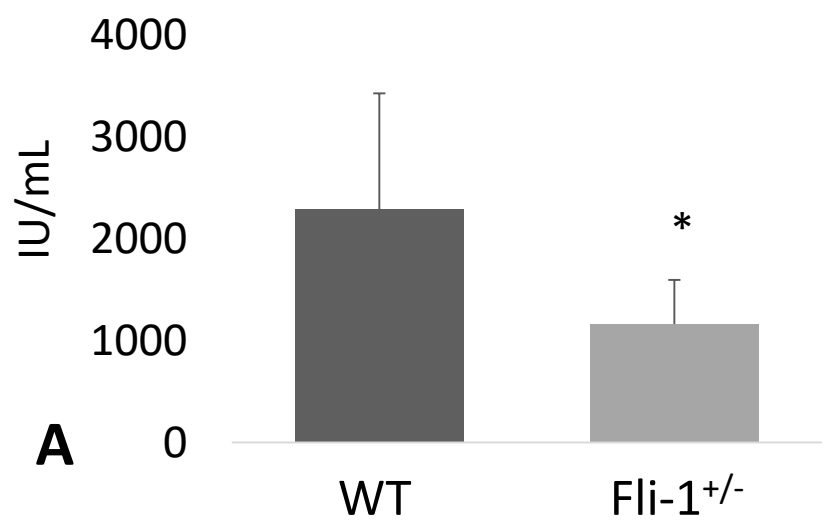

**A**

### Urinary protein levels

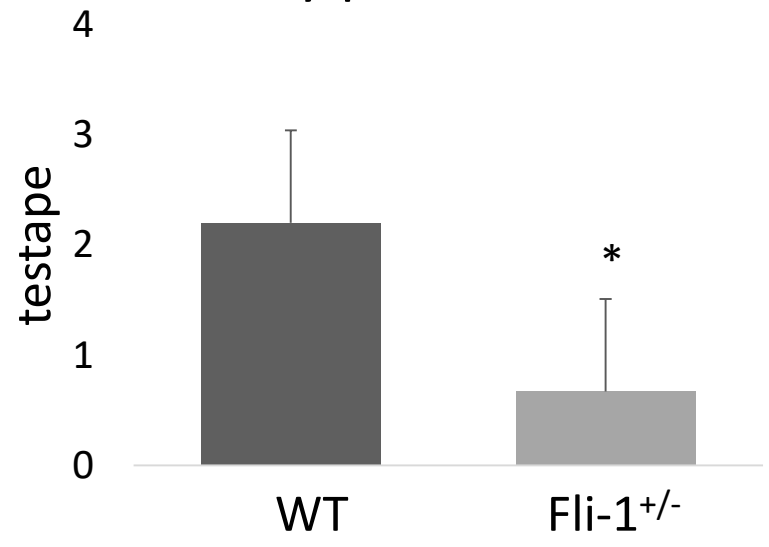

**B**

**MRL/lpr *Fli-1*<sup>+/+</sup> (WT)**

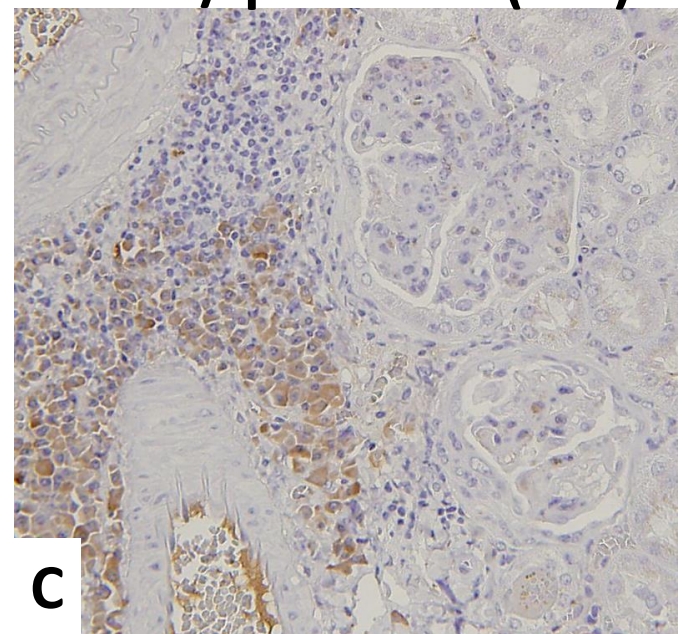

**C**

***Fli-1*<sup>+/-</sup>**

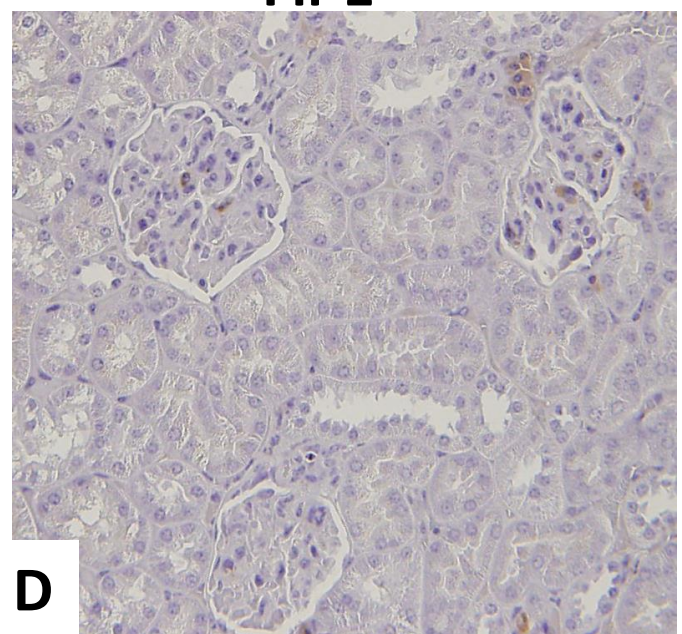

**D**

\*P < 0.05

× 400
